# Supplementary material for: Effects of Postcuring Temperature on the Mechanical Properties and Biocompatibility of Three-Dimensional Printed Dental Resin Material
Source: PubMed Central journal article supplement (PMC8067535; doi:10.3390/polym13081180), 2021-04-07

**Table S1.** Degree of conversion of three-dimensional printed resin under various curing conditions. Data are mean±standard deviation values. Different uppercase letters indicate a significant difference in postcuring time for the respective curing temperature group in the same row. Different lowercase letters indicate a significant difference in postcuring temperature according to postcuring time.

|      | Green state               | 15 min                    | 30 min                    | 60 min                    | 90 min                    | 120 min                    |
|------|---------------------------|---------------------------|---------------------------|---------------------------|---------------------------|----------------------------|
| 40°C | 43.03±1.46 <sup>A,a</sup> | 58.08±1.28 <sup>B,a</sup> | 59.63±0.37 <sup>C,a</sup> | 60.41±0.78 <sup>C,a</sup> | 59.70±0.90 <sup>C,a</sup> | 59.37±1.03 <sup>BC,a</sup> |
| 60°C | 43.03±1.46 <sup>A,a</sup> | 60.05±0.69 <sup>B,b</sup> | 62.01±0.66 <sup>C,b</sup> | 62.32±0.52 <sup>C,b</sup> | 62.37±0.39 <sup>C,b</sup> | 63.02±0.42 <sup>C,b</sup>  |
| 80°C | 43.03±1.46 <sup>A,a</sup> | 61.38±0.82 <sup>B,c</sup> | 61.30±0.67 <sup>B,c</sup> | 61.46±0.51 <sup>B,c</sup> | 62.73±0.87 <sup>C,b</sup> | 62.67±0.29 <sup>C,b</sup>  |

**Figure S1.** Disk-shaped specimen, with a diameter of 9 mm and a thickness of 2 mm, were designed using a 3D modeling software for Vickers hardness, biocompatibility test and degree of conversion.

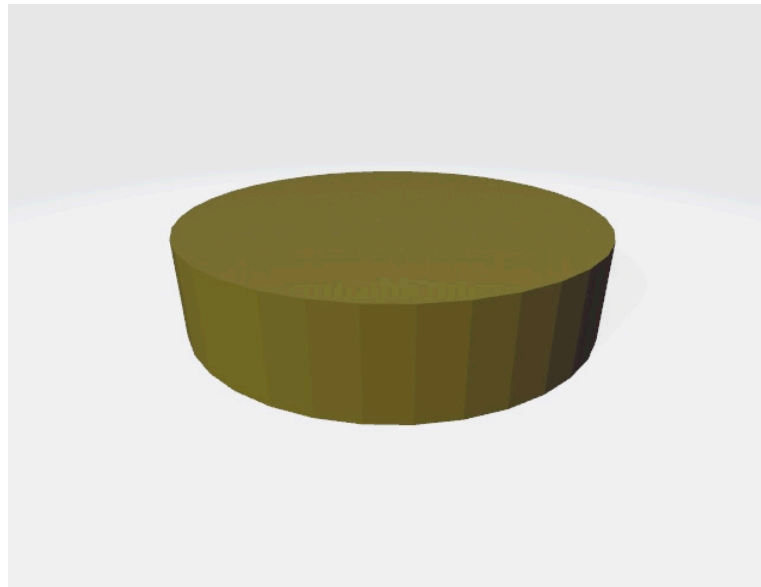

**Table S2.** HGFs were seeded into 48-well plates at a density of  $5 \times 10^4$  cells/specimen. The number of cells attached on each specimen ( $n=3$ ) was counted after 24, 48 and 72 h of incubation. Mean values are presented.

|                     | Number of cells ( $\times 10^4$ cells) |       |       |
|---------------------|----------------------------------------|-------|-------|
|                     | 24 h                                   | 48 h  | 72 h  |
| <b>PC</b>           | 3.240                                  | 3.333 | 4.160 |
| <b>Green state</b>  | 0.007                                  | 0.020 | 0     |
| <b>40°C 15 min</b>  | 0.253                                  | 0.027 | 0     |
| <b>40°C 30 min</b>  | 0.233                                  | 0.073 | 0     |
| <b>40°C 60 min</b>  | 0.147                                  | 0.013 | 0     |
| <b>40°C 90 min</b>  | 0.073                                  | 0.073 | 0     |
| <b>40°C 120 min</b> | 0.540                                  | 0.087 | 0     |
| <b>60°C 15 min</b>  | 0.247                                  | 0.053 | 0.007 |
| <b>60°C 30 min</b>  | 1.033                                  | 0.040 | 0     |
| <b>60°C 60 min</b>  | 0.533                                  | 0.133 | 0.013 |
| <b>60°C 90 min</b>  | 0.760                                  | 0.040 | 0.020 |
| <b>60°C 120 min</b> | 0.667                                  | 0.033 | 0.013 |
| <b>80°C 15 min</b>  | 1.793                                  | 1.633 | 1.780 |
| <b>80°C 30 min</b>  | 2.233                                  | 1.460 | 1.920 |
| <b>80°C 60 min</b>  | 1.740                                  | 1.573 | 1.880 |
| <b>80°C 90 min</b>  | 2.613                                  | 1.420 | 1.640 |
| <b>80°C 120 min</b> | 2.1                                    | 1.847 | 2.053 |

**Figure S2.** CLSM images of HGFs cultured ( $1 \times 10^5$  cells/ml) on 3D printed specimens postcured at various temperatures and times after 24 h of incubation. (A) GS, (B) Positive control (C) 40°C for 15 min, (D) 40°C for 30 min, (E) 40°C for 60 min, (F) 40°C for 90 min, (G) 40°C for 120 min, (H) 60°C for 15 min, (I) 60°C for 30 min, (J) 60°C for 60 min, (K) 60°C for 90 min, (L) 60°C for 120 min, (M) 80°C for 15 min, (N) 80°C for 30 min, (O) 80°C for 60 min, (P) 80°C for 90 min, and (Q) 80°C for 120 min.

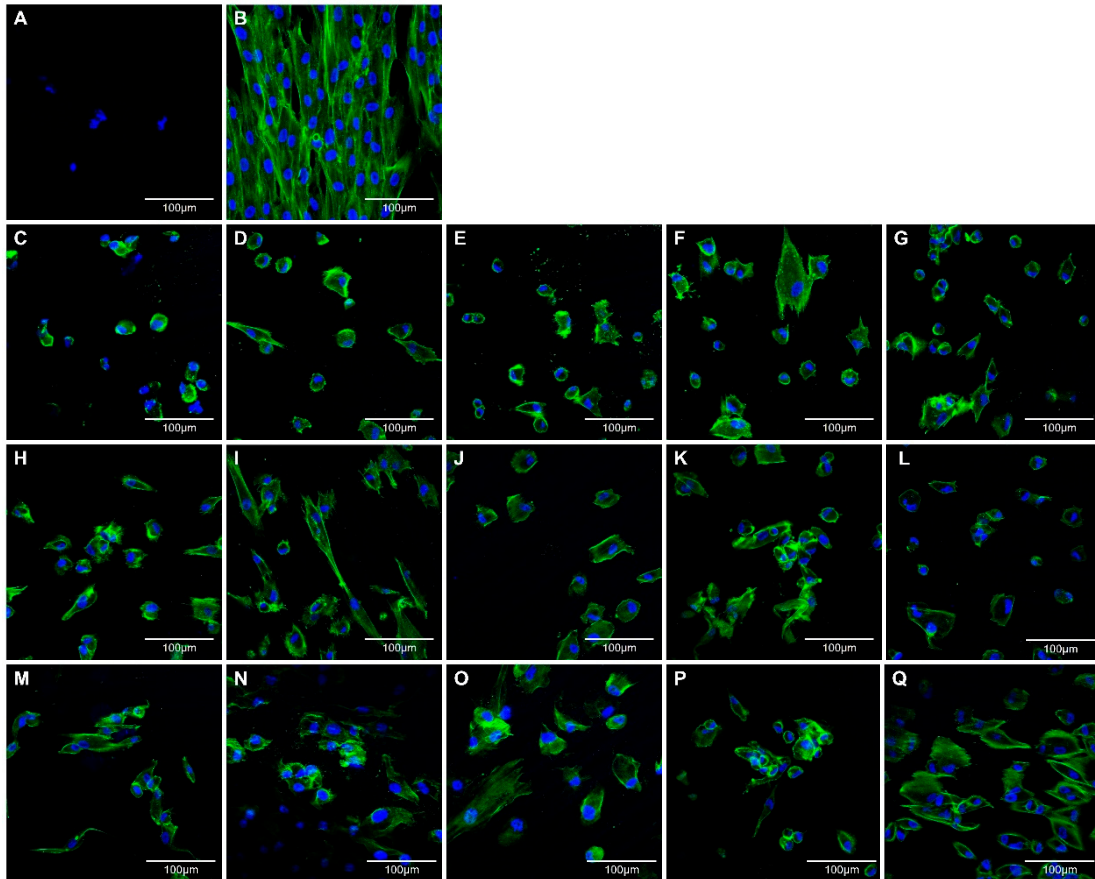

**Figure S3.** CLSM images of HGFs cultured ( $1 \times 10^5$  cells/ml) on 3D printed specimens postcured at various temperatures and times after 48 h of incubation. (A) GS, (B) Positive control (C) 40°C for 15 min, (D) 40°C for 30 min, (E) 40°C for 60 min, (F) 40°C for 90 min, (G) 40°C for 120 min, (H) 60°C for 15 min, (I) 60°C for 30 min, (J) 60°C for 60 min, (K) 60°C for 90 min, (L) 60°C for 120 min, (M) 80°C for 15 min, (N) 80°C for 30 min, (O) 80°C for 60 min, (P) 80°C for 90 min, and (Q) 80°C for 120 min.

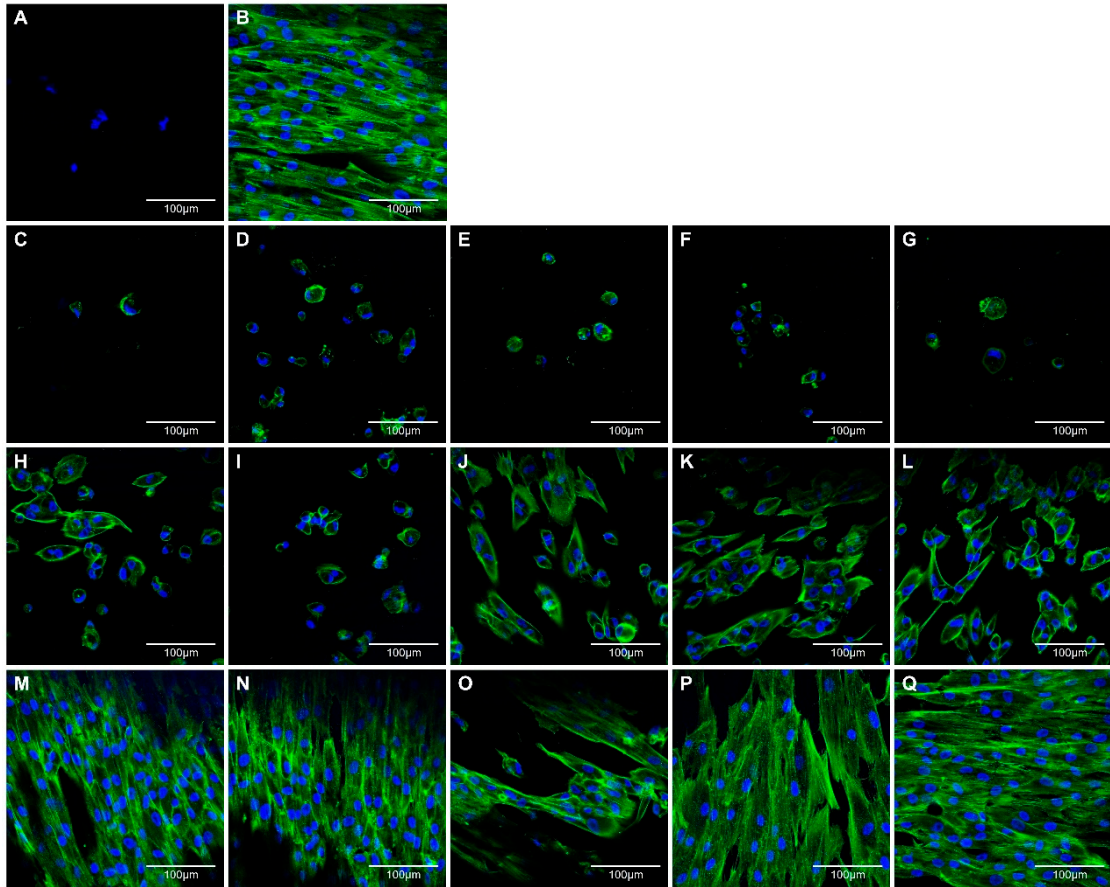

**Figure S4.** CLSM images of HGFs cultured ( $1 \times 10^5$  cells/ml) on 3D printed specimens postcured at various temperatures and times after 72 h of incubation. (A) GS, (B) Positive control (C) 40°C for 15 min, (D) 40°C for 30 min, (E) 40°C for 60 min, (F) 40°C for 90 min, (G) 40°C for 120 min, (H) 60°C for 15 min, (I) 60°C for 30 min, (J) 60°C for 60 min, (K) 60°C for 90 min, (L) 60°C for 120 min, (M) 80°C for 15 min, (N) 80°C for 30 min, (O) 80°C for 60 min, (P) 80°C for 90 min, and (Q) 80°C for 120 min.

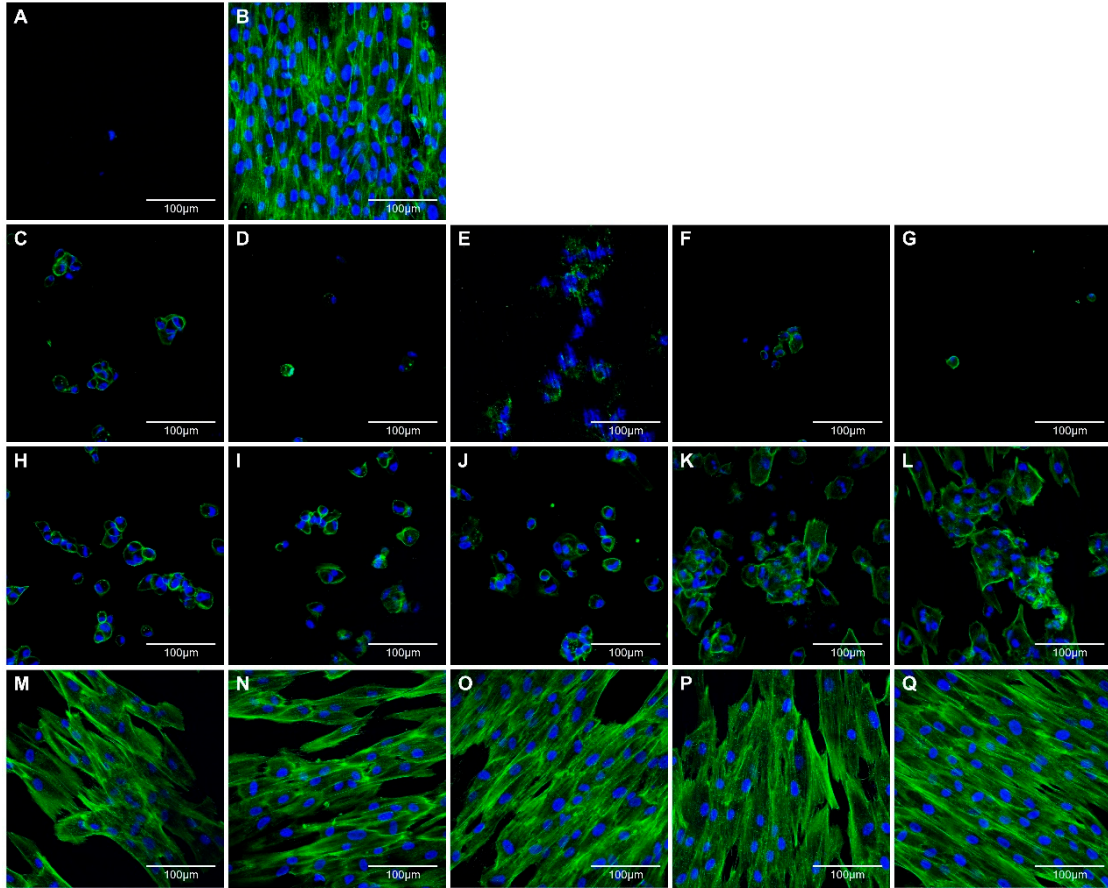

Supplement: polymers-13-01180-s001.pdf [file polymers-13-01180-s001.pdf]
